# Supplementary material for: Interaction between the tRNA-Binding and C-Terminal Domains of Yeast Gcn2 Regulates Kinase Activity In Vivo
Source: PubMed Central journal article supplement (PMC4335047; doi:10.1371/journal.pgen.1004991), 2015-02-19

Fig.S2-A

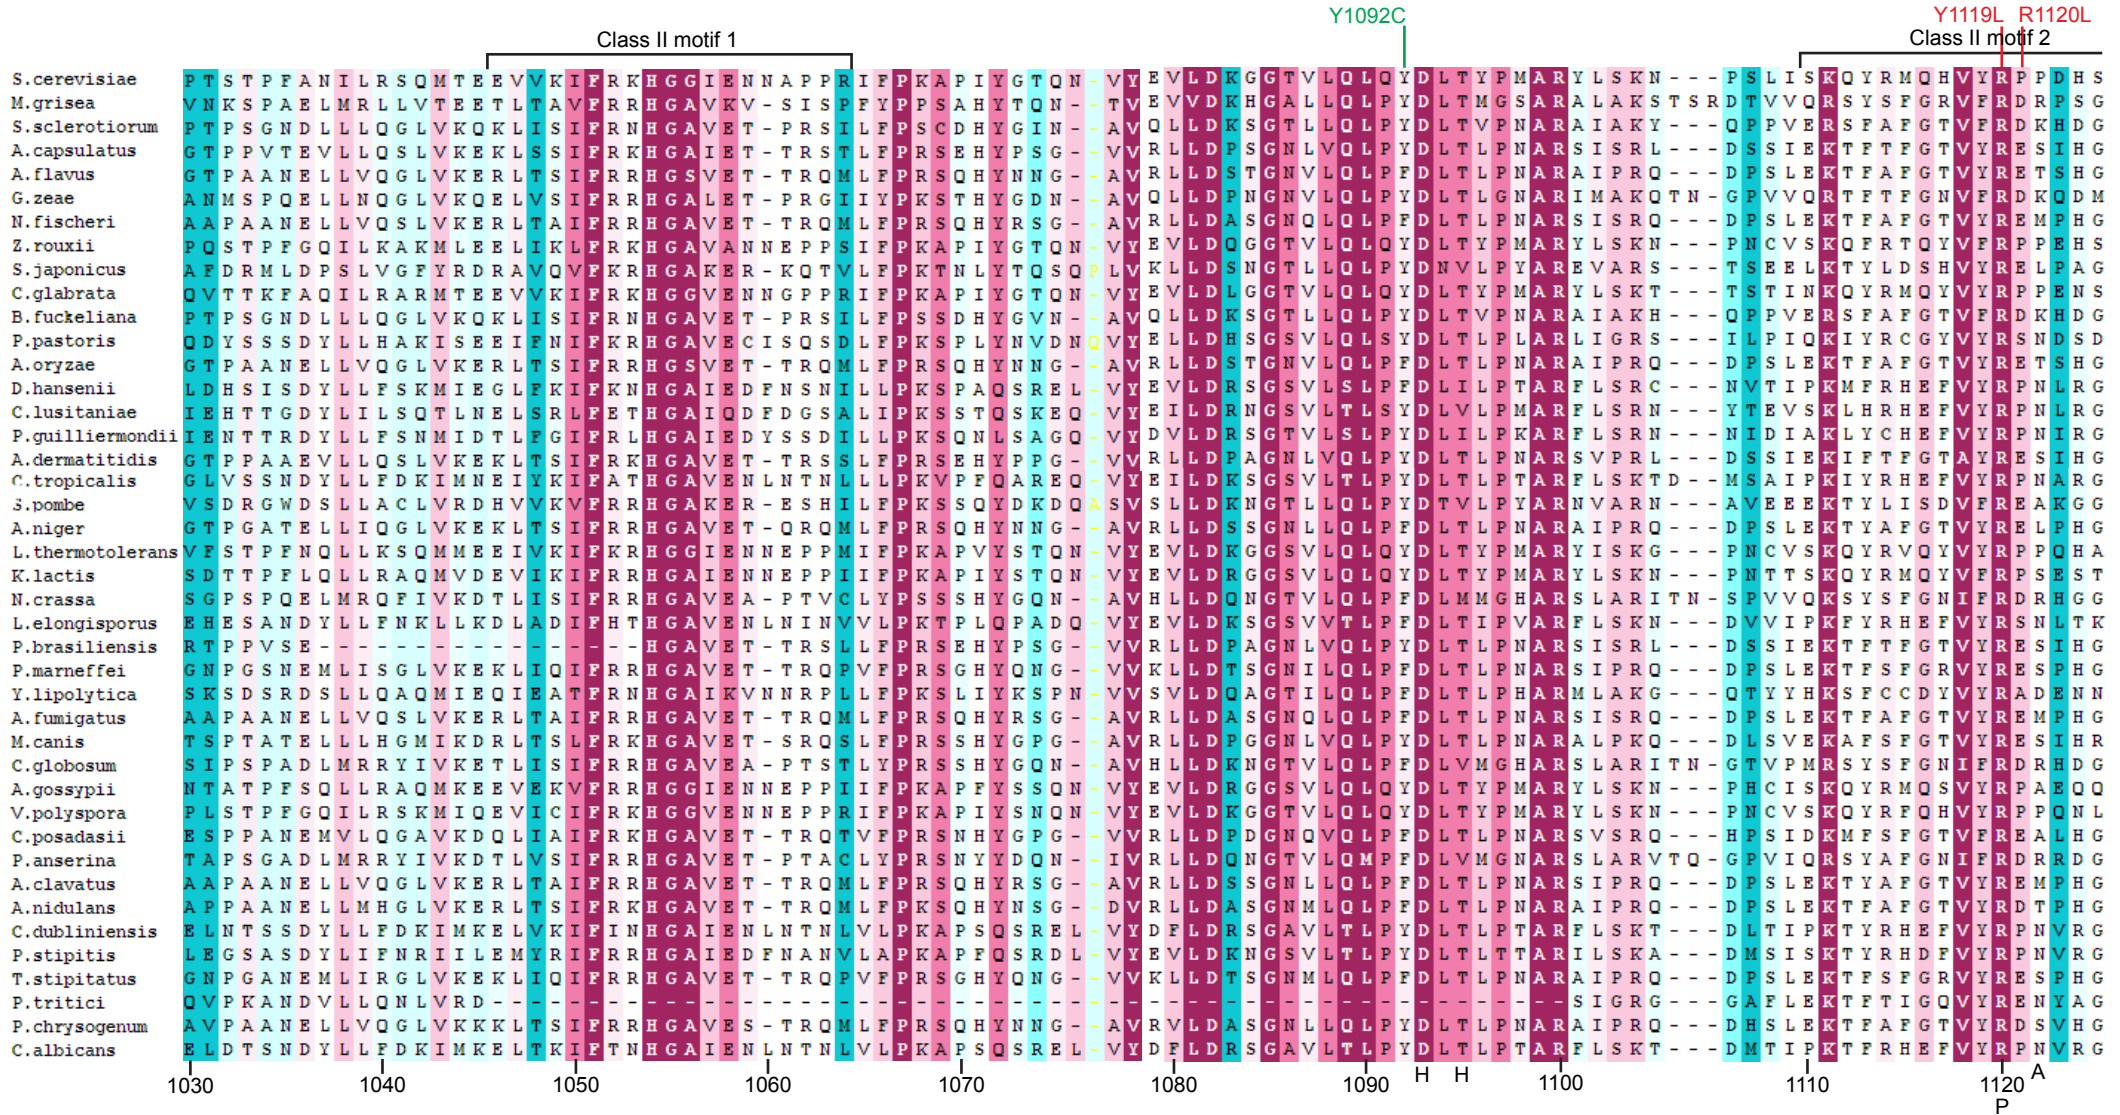

Fig.S2-B

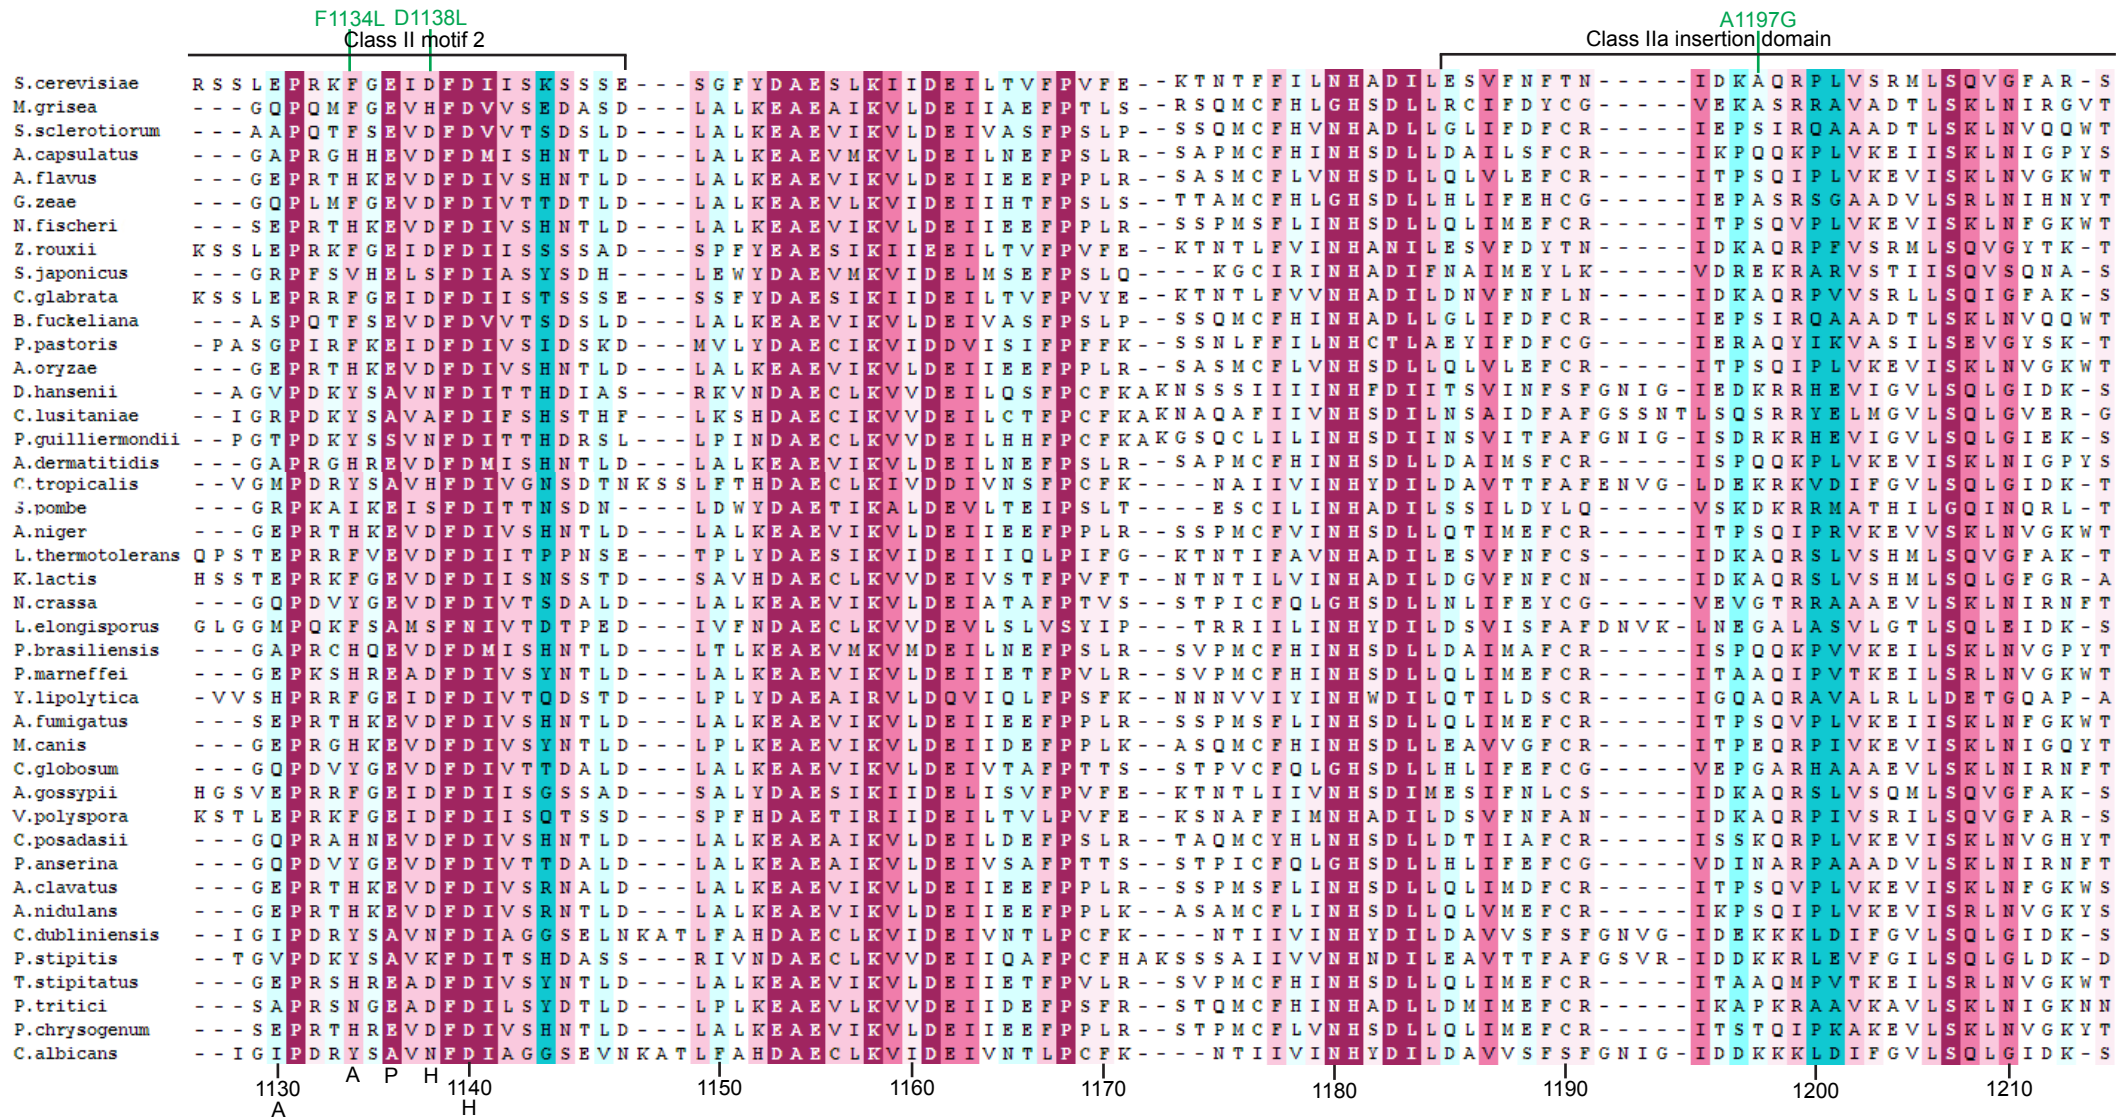

Fig.S2-C

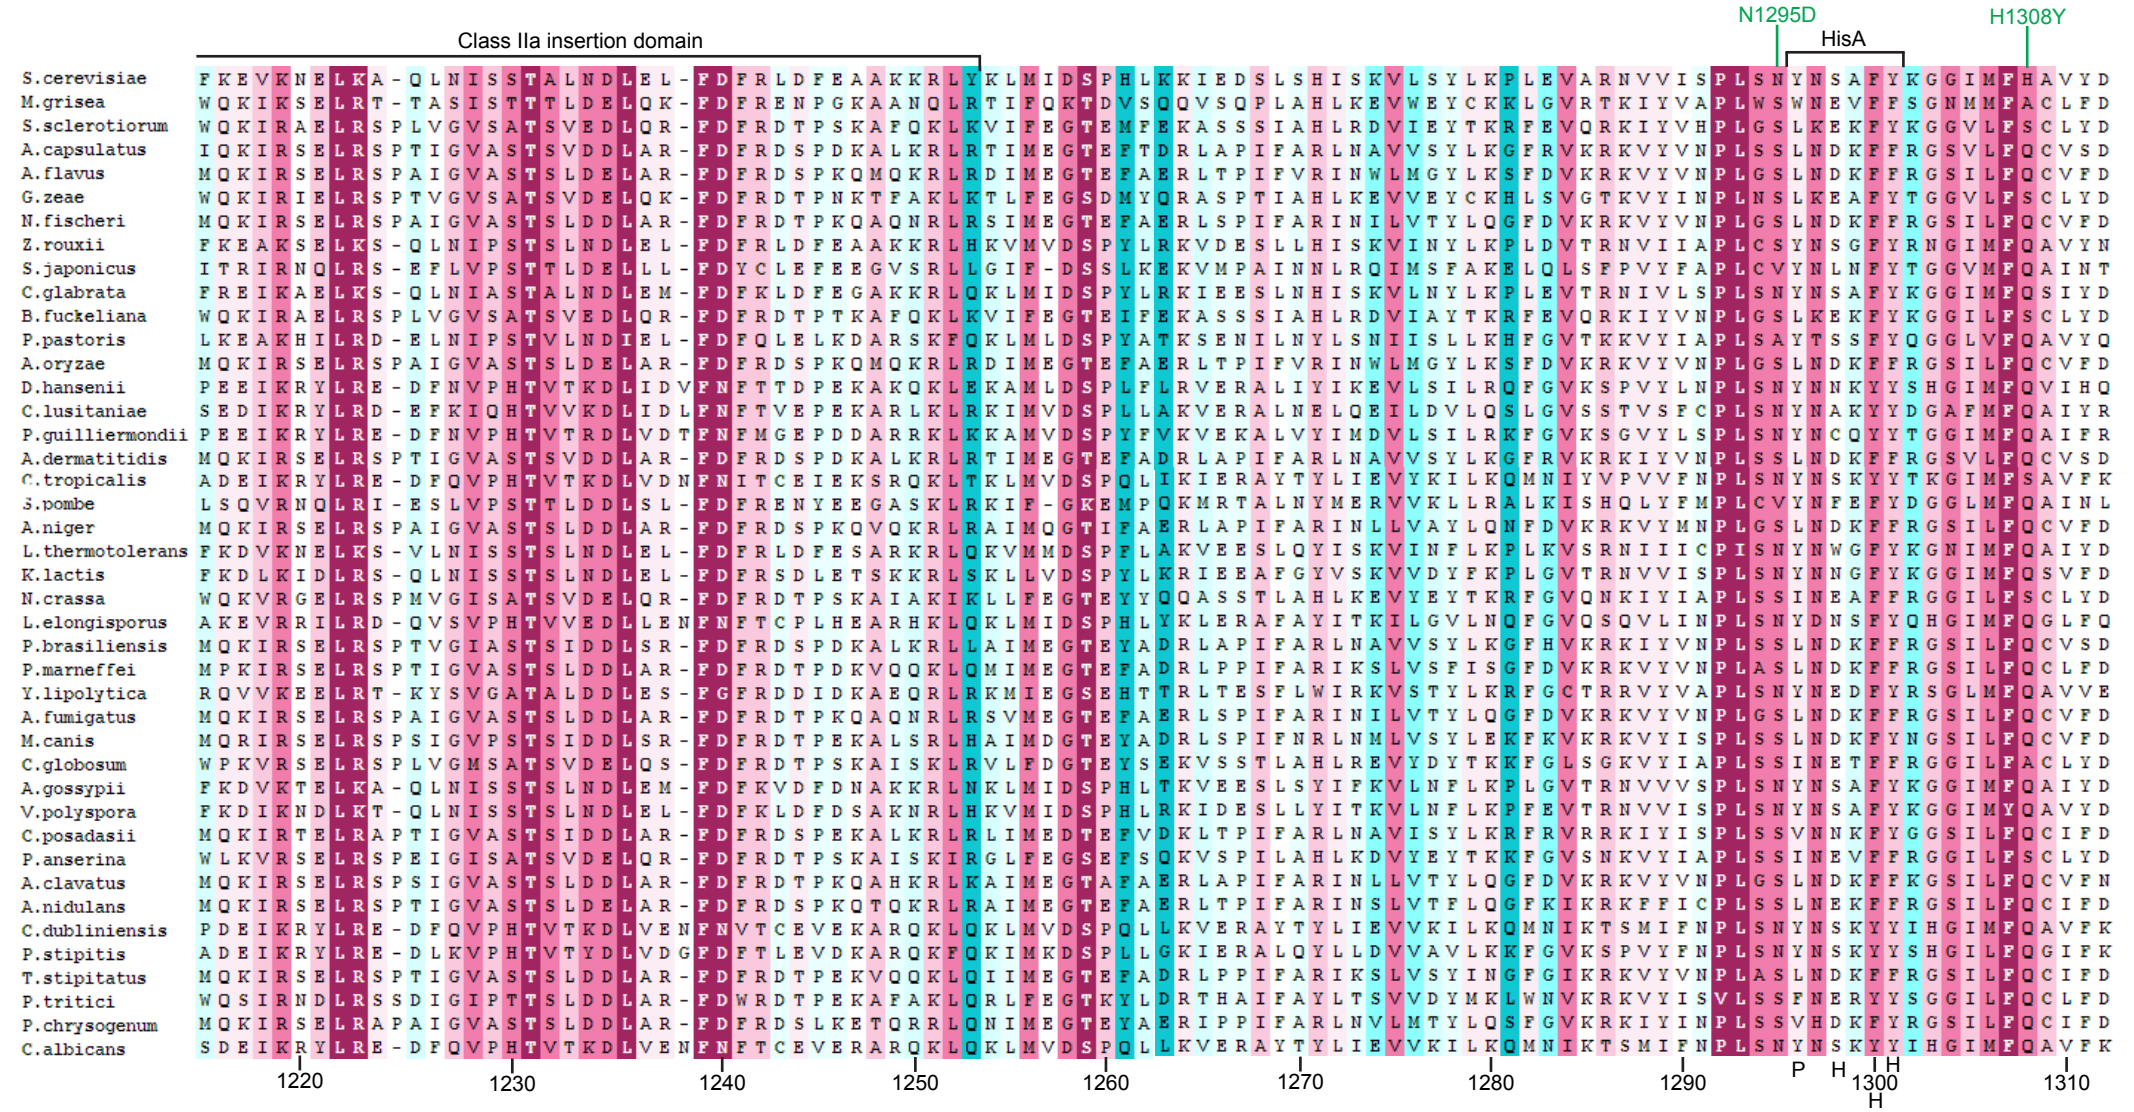

Supplement: pgen.1004991.s002.pdf [file pgen.1004991.s002.pdf]
